# Supplementary material for: The effect of copper(ii), iron(ii) sulphate, and vitamin C combinations on the weak antimicrobial activity of (+)-catechin against Staphylococcus aureus and other microbes
Source: Royal Society of Chemistry journal article supplement (doi:10.1039/c2mt20143g), 2012-01-01
Supplement: c2mt20143g.pdf [file c2mt20143g.pdf]

**Supplementary Table: Details of main treatments and accompanying controls with profiles of additives used in the assays. Results are shown as viabilities with SEM's in brackets based on at least 3 replicates; ranges are shown where appropriate.**

| Main treatments (MT + number, in bold) plus controls (Ref. to fig/table no. in main text in brackets) | Additives (final concentrations shown) |                         |                 |               |           |                                 | Inocula (0.5 McFarland standard)                       | Results<br>Viability (log <sub>10</sub> cfu mL <sup>-1</sup> )                 |
|-------------------------------------------------------------------------------------------------------|----------------------------------------|-------------------------|-----------------|---------------|-----------|---------------------------------|--------------------------------------------------------|--------------------------------------------------------------------------------|
|                                                                                                       | Catechin (μM)                          | Iron(II)/(III) (μM)     | Copper(II) (μM) | VitaminC (μM) | EDTA (μM) | Catalase (μg mL <sup>-1</sup> ) |                                                        |                                                                                |
| Buffer (fig 2)                                                                                        | <sup>b</sup> Lambda                    |                         |                 |               |           |                                 | <i>S. aureus, E. coli, Ps.aeruginosa, P.mirabilis,</i> | <i>Sa, 7.66 (± 0.52); Ec, 7.08 (± 0.21) Psa, 7.83(± 0.21); Pm,7.18 (±1.08)</i> |
| (+)-Catechin alone (fig 2)                                                                            | 214                                    |                         |                 |               |           |                                 | "                                                      | <i>Sa, 7.66 (± 0.52); Ec, 7.08 (± 0.21) Psa, 7.83(± 0.21); Pm,7.18 (±1.08)</i> |
| Ringer's pH: 3.5                                                                                      | Ringer's                               |                         |                 |               |           |                                 | "                                                      | <i>Sa, 7.63 (± 0.76); Ec, 7.77 (± 0.40) Psa, 7.92(± 0.55); Pm,7.87 (±0.43)</i> |
| pH: 5.5                                                                                               | Ringer's                               |                         |                 |               |           |                                 | "                                                      | <i>Sa, 7.61(± 0.82); Ec, 7.89 (± 0.83) Psa, 7.59(± 0.65); Pm,7.79 (±0.50)</i>  |
| pH: 7.2                                                                                               | Ringer's                               |                         |                 |               |           |                                 | "                                                      | <i>Sa,7.65 (± 0.85); Ec, 7.60 (± 1.03) Psa, 8.01 (± 0.40);Pm,7.53 (±0.82)</i>  |
| Cu(II): fresh (fig 2)                                                                                 | Ringer's                               |                         | 214             |               |           |                                 | <i>S. aureus, E. coli, Ps.aeruginosa, P.mirabilis,</i> | <i>Sa, 5.92 (± 0.89); Ec, 3.09(± 0.56) Psa, 6.65(± 0.54); Pm,5.13 (±0.62)</i>  |
| <b>MT1. (+)-Catechin + copper(II) (fig 2)</b>                                                         | 214                                    |                         | 214             |               |           |                                 | <i>S. aureus, E. coli</i>                              | <i>Sa, 4.93 (± 0.66); Ec, 2.83(± 0.48) Psa, 4.11(± 0.73); Pm,4.11 (±0.73)</i>  |
| Fe(II): fresh, (fig 3)                                                                                | Ringer's                               | 214 Fe(II) fresh        |                 |               |           |                                 | "                                                      | <i>Sa, 7.50 (± 0.82); Ec, 6.75 (± 0.62)</i>                                    |
| heated,                                                                                               | Ringer's                               | 214 Fe(II) heated       |                 |               |           |                                 | "                                                      | <i>Sa, 6.99 (± 0.37); Ec, 7.44 (± 0.62)</i>                                    |
| autoclaved                                                                                            | Ringer's                               | 214 Fe(II) autoclvd.    |                 |               |           |                                 | "                                                      | <i>Sa, 7.52 (± 0.55); Ec, 7.91 (± 0.76)</i>                                    |
| Fe(III): fresh,                                                                                       | Ringer's                               | 214 Fe(III) fresh       |                 |               |           |                                 | <i>S. aureus, E. coli</i>                              | <i>Sa, 7.33 (± 0.48); Ec, 7.87 (± 0.61)</i>                                    |
| heated,                                                                                               | Ringer's                               | 214 Fe(III) heated      |                 |               |           |                                 | "                                                      | <i>Sa, 7.49 (± 0.46); Ec, 7.77 (± 0.49)</i>                                    |
| autoclaved                                                                                            | Ringer's                               | 214 Fe(III) autoclvd.   |                 |               |           |                                 | "                                                      | <i>Sa, 7.99 (± 0.44); Ec, 8.03 (± 0.41)</i>                                    |
| Cu(II): heated                                                                                        | Ringer's                               |                         | 214             |               |           |                                 | "                                                      | <i>Sa, 6.01 (± 0.57); Ec, 4.25(± 0.38)</i>                                     |
| <b>MT2. (+)-Catechin + fresh, or heated or autoclaved Fe(II) or Fe(III)</b>                           | 214                                    | 214 Fe(II) fresh (fig3) |                 |               |           |                                 | "                                                      | <i>Sa, 5.38 (± 0.53); Ec, 6.93 (± 0.50)</i>                                    |
|                                                                                                       | 214                                    | 214 Fe(II) heated       |                 |               |           |                                 | "                                                      | <i>Sa, 7.51 (± 0.50); Ec, 8.05 (± 0.38)</i>                                    |
|                                                                                                       | 214                                    | 214 Fe(II) autoclvd.    |                 |               |           |                                 | "                                                      | <i>Sa, 7.92 (± 0.42); Ec, 7.89 (± 0.61)</i>                                    |
|                                                                                                       | 214                                    | 214 Fe(III) fresh       |                 |               |           |                                 | "                                                      | <i>Sa, 7.84 (± 0.68); Ec, 7.71 (± 0.48)</i>                                    |
|                                                                                                       | 214                                    | 214 Fe(III) heated      |                 |               |           |                                 | "                                                      | <i>Sa, 7.22 (± 0.50); Ec, 8.64 (± 0.48)</i>                                    |

|                                                             |          |                       |     |      |      |         |   |                                                  |
|-------------------------------------------------------------|----------|-----------------------|-----|------|------|---------|---|--------------------------------------------------|
|                                                             | 214      | 214 Fe(III) autoclvd. |     |      |      |         | " | Sa, 7.23 (± 0.67); Ec, 4.53 (± 0.65)             |
| Fe(II) + Cu(II) (fig 3)                                     | Ringer's | 214 Fe(II) fresh      | 214 |      |      |         | " | Sa, 5.03 (± 0.65); Ec, 3.79 (± 0.70)             |
| <b>MT3. (+)-Catechin + Fe(II)+Cu(II) (fig 3)</b>            | 214      | 214 Fe(II) fresh      | 214 |      |      |         | " | Sa, 4.75 (± 0.45); Ec, 2.50(± 0.44)              |
| Vit. C alone                                                | Ringer's |                       |     | 1712 |      |         | " | Sa 7.58 (± 0.56); Ec, 7.64 (± 0.44)              |
| (+)-Catechin + vit. C                                       | 214      |                       |     | 1712 |      |         | " | Sa, 7.82 (± 0.34); Ec, 7.97 (± 0.51)             |
| Cu(II) + vit. C alone (table 1)                             | Ringer's |                       | 214 | 428  |      |         | " | Sa, 4.85 (± 0.52); Ec, 0 log <sub>10</sub> units |
|                                                             |          |                       | 214 | 856  |      |         | " | Sa, 4.37 (± 0.73); Ec, 0 log <sub>10</sub> units |
|                                                             |          |                       | 214 | 1712 |      |         | " | Sa, 2.41 (± 0.79); Ec, 0 log <sub>10</sub> units |
| <b>MT4. (+)-Catechin + Cu(II) + vit. C (table 1)</b>        | 214      |                       | 214 | 428  |      |         | " | Sa, 3.77 (± 0.82); Ec, 0 log <sub>10</sub> units |
|                                                             | 214      |                       | 214 | 856  |      |         | " | Sa, 3.11 (± 0.12); Ec, 0 log <sub>10</sub> units |
|                                                             | 214      |                       | 214 | 1712 |      |         | " | Sa, 1.29 (± 0.48); Ec, 0 log <sub>10</sub> units |
| Fe(II) + vit. C                                             | Ringer's | 214 Fe(II) fresh      |     | 856  |      |         | " | Sa, 8.15 (± 0.63); Ec, 7.63 (± 0.15)             |
| <b>MT5. (+)-Catechin + Fe(II) + vit. C</b>                  | 214      | 214 Fe(II) fresh      |     | 856  |      |         | " | Sa, 8.21 (± 1.11); Ec, 7.38 (± 0.55)             |
| Fe(II) + Cu(II) + vit.C                                     | Ringer's | 214 Fe(II) fresh      | 214 | 856  |      |         | " | Sa, 4.94 (± 1.02); Ec, 7.44 (± 0.59)             |
| <b>MT6. (+)-Catechin + Fe(II) + Cu(II) + vit. C (fig 3)</b> | 214      | 214 Fe(II) fresh      | 214 | 856  |      |         | " | Sa, 4.76 (± 0.67); Ec, 2.60 (± 0.55)             |
| EDTA alone                                                  | Ringer's |                       |     |      | 2140 |         | " | Sa, 8.23 (± 0.41 ; Ec, 7.21 (± 0.51)             |
| Fe(II) + Cu(II) + EDTA                                      | Ringer's | 214 Fe(II) fresh      | 214 |      | 535  |         | " | Sa, 8.02 (± 0.33); Ec, 7.12 (± 0.49)             |
| <b>MT7. (+)-Catechin + Fe(II) + Cu(II) + EDTA</b>           | 214      | 214 Fe(II) fresh      | 214 |      | 1070 |         | " | Sa, 7.97 (± 0.36); Ec, 7.50 (± 0.42)             |
| <b>MT8. Cu(II) + catalase</b>                               | Ringer's |                       | 214 |      |      | 0 - 200 | " | Sa, 6.62-7.49 (± 0.33-1.02)                      |
|                                                             |          |                       |     |      |      | 0 - 600 | " | Ec, 2.98-7.70 (± 0.25-1.09)                      |

|                                                                       |          |                  |     |     |  |                    |        |                                                                            |
|-----------------------------------------------------------------------|----------|------------------|-----|-----|--|--------------------|--------|----------------------------------------------------------------------------|
| (fig 4)<br>Catalase alone                                             | Ringer's |                  |     |     |  | 600                | "      | <i>Sa</i> , 7.72 (± 0.33); <i>Ec</i> , 7.34 (± 0.45)                       |
| (+)-Catechin + catalase                                               | 214      |                  |     |     |  | 600                | "      | <i>Sa</i> , 7.43 (± 0.49); <i>Ec</i> , 7.87 (± 0.48)                       |
| Fe(II) + Cu(II)<br>+catalase                                          | Ringer's | 214 Fe(II) fresh | 214 |     |  | 600                | "      | <i>Sa</i> , 8.16 (± 0.70); <i>Ec</i> , 6.60 (± 0.44)                       |
| Vit. C + catalase                                                     | Ringer's |                  |     | 856 |  | 600                | "      | <i>Sa</i> , 7.53 (± 0.48); <i>Ec</i> , 7.10 (± 0.62)                       |
| <b>MT9. (+)-Catechin +<br/>Cu(II) + vit. C +<br/>catalase (fig 5)</b> | 214      | 214 Fe(II) fresh |     | 856 |  | 0 - 200<br>0 - 600 | "<br>" | <i>Sa</i> , 1.84-7.74 (± 0.18-0.32)<br><i>Ec</i> , 2.12-7.27 (± 0.25-0.55) |
| Cu(II) + Vit.C +<br>catalase                                          | 214      |                  |     |     |  | 0 - 200<br>0 - 600 | "<br>" | <i>Sa</i> , 2.35-7.68 (± 0.08-1.10)<br><i>Ec</i> , 2.00-7.57 (± 0.31-0.46) |
| <b>MT10. (+)-Catechin +<br/>Fe(II) + Cu(II) +<br/>catalase</b>        | Ringer's |                  | 214 |     |  | 600                | "      | <i>Sa</i> , 8.02 (± 0.35); <i>Ec</i> , 7.77 (± 0.53)                       |
| (+)-catechin + Fe(II) +<br>catalase                                   | 214      | 214 Fe(II) fresh | 214 |     |  | 600                | "      | <i>Sa</i> , 7.23 (± 0.42); <i>Ec</i> , 8.01 (± 0.53)                       |
| (+)-catechin + Cu(II) +<br>catalase                                   | 214      |                  | 214 |     |  | 600                | "      | <i>Sa</i> , 7.57 (± 0.48); <i>Ec</i> , 7.16 (± 0.49)                       |

**Fe(II)** = aqueous iron(II) sulphate heptahydrate; **Fe(III)** = aq. iron(III) chloride solution; **Cu(II)** = aq. copper(II) sulphate pentahydrate; **EDTA** = aq. Ethylenediamine acetic acid disodium salt; **Catalase** = bovine liver catalase solution 50 mg mL<sup>-1</sup> with an activity of ca. 47 kU mg<sup>-1</sup> protein. **Inocula**: *Sa* = *S. aureus* = *Staphylococcus aureus* NCTC 06571, *Psa* = *Ps.aeruginosa* = *Pseudomonas aeruginosa* NCTC 950, *Pm* = *P.mirabilis* = *Proteus mirabilis* NCTC 7827, *Ec* = *E. coli* = *Escherichia coli* NCTC 14441

#### Notes on Methodology

The assay mixtures made up to produce the final concentrations shown above used following volumes and concentrations of solutions shown below:

#### Main treatments (MT + number, shown in bold) and controls:

Buffer: <sup>b</sup>All assays featured 1000µL control samples of lambda buffer adjusted to pH 7.2 as a control.

Ringer's solution adjusted to different pH values: 1000 µL Ringer's solution adjusted to pH 3.5, or 5.5, or 7.2

(+)-Catechin alone: 330 µL 1000 µM (+)-catechin + 700 µL Ringer's solution

Cu(II) alone, fresh, heated: 330 µL Ringer's solution + 700 µL 472 µM Cu(II)SO<sub>4</sub>

**MT1: 330 µL 1000 µM (+)-catechin + 700 µL 472 µM Cu(II)SO<sub>4</sub>**

Fe(II) alone, fresh, heated, autoclaved: 330 µL Ringer's solution + 700 µL 472 µM Fe(II)SO<sub>4</sub> either freshly made, or freshly made and then heated, or freshly made and then autoclaved

Fe(III) alone, fresh, heated, autoclaved: 330 µL Ringer's solution + 700 µL 472 µM Fe(III)Cl<sub>3</sub> prepared as Fe(II) above

Fe(II) + Cu(II): 330 µL Ringer's solution + 350 µL 944 µM Fe(II)SO<sub>4</sub> + 350 µL 944 µM Cu(II)SO<sub>4</sub>

**MT2: 330 µL 1000 µM (+)-catechin + 700 µL 472 µM Fe(II)SO<sub>4</sub> or Fe(III)Cl<sub>3</sub>, in each case either freshly made, or freshly made and then heated ,or freshly made and then autoclaved**

**MT3: 330 µL 1000 µM (+)-catechin + 350 µL 944 µM Fe(II)SO<sub>4</sub> + 350 µL 944 µM Cu(II)SO<sub>4</sub>**

Vitamin C alone: 330 µL Ringer's solution + 700 µL 1510 µM vit. C

(+)-Catechin + vit. C: 330 µL 1000 µM (+)-catechin + 700 µL 1510 µM vit. C

Cu(II) + vit. C alone: 330 µL Ringer's solution + 350 µL 944 µM Cu(II)SO<sub>4</sub> + 350 µL 1888 µM, or 3776 µM ,or 7552 µM vit. C respectively

**MT4: 330 µL 1000 µM (+)-catechin + 350 µL 944 µM Cu(II)SO<sub>4</sub> + 350 µL 1888 µM, or 3776 µM, or 7552 µM vit. C respectively**

Fe(II) + vit. C: 330 µL Ringer's solution + 350 µL 944 µM Fe(II)SO<sub>4</sub> + 350 µL 3776 µM vit. C

**MT5: 330 µL 1000 µM (+)-catechin + 350 µL 944 µM Fe(II)SO<sub>4</sub> + 350 µL 3776 µM vit. C**

Fe(II) + Cu(II) + vit. C: 330 µL Ringer's solution + 175 µL 1888 µM Fe(II)SO<sub>4</sub> + 175 µL 1888 µM Cu(II)SO<sub>4</sub> + 175 µL 3776 µM vit. C

**MT6: 330 µL 1000 µM (+)-catechin + 175 µL 1888 µM Fe(II)SO<sub>4</sub> + 175 µL 1888 µM Cu(II)SO<sub>4</sub> + 175 µL 3776 µM vit. C**

EDTA alone: 330 µL Ringer's solution + 700 µL 2140 µM EDTA solution

Fe(II) + Cu(II) + EDTA: 330 µL Ringer's solution + 175 µL 1888 µM Fe(II)SO<sub>4</sub> + 175 µL 1888 µM Cu(II)SO<sub>4</sub> + 175 µL 2140 µM EDTA

**MT7: 330 µL 1000 µM (+)-catechin + 175 µL 1888 µM Fe(II)SO<sub>4</sub> + 175 µL 1888 µM Cu(II)SO<sub>4</sub> + 175 µL 2140 µM EDTA**

**MT8: 330 µL Ringer's solution + 700 µL 472 µM Cu(II)SO<sub>4</sub> + <sup>\*</sup>catalase at concentrations specified**

<sup>\*</sup>Catalase alone: 1000 µL Ringer's solution + catalase at concentration specified

(+)-Catechin + catalase: 330 µL 1000 µM (+)-catechin + 700 µL Ringer's solution + catalase at concentration specified

Fe(II) + Cu(II) + catalase: 330 µL Ringer's solution + 350 µL 944 µM Fe(II)SO<sub>4</sub> + 350 µL 944 µM Cu(II)SO<sub>4</sub> + catalase at concentration specified

Vit. C + catalase: 650 µL Ringer's solution + 350 µL 3776 µM vit. C + catalase at concentration specified

**MT9: 330 µL 1000 µM (+)-catechin + 350 µL 944 µM Cu(II)SO<sub>4</sub> + 350 µL 3776 µM vit. C + catalase at concentrations specified**

Cu(II) + vit. C + catalase: 650 µL Ringer's solution + 350 µL 3776 µM vit. C + catalase at concentrations specified

**MT10: 330 µL 1000 µM (+)-catechin + 350 µL 944 µM Fe(II)SO<sub>4</sub> + 350 µL 944 µM Cu(II)SO<sub>4</sub> + catalase at concentration specified**

(+)-Catechin + Fe(II) + catalase: 330 µL 1000 µM (+)-catechin + 700 µL 472 µM Fe(II)SO<sub>4</sub> + catalase at concentration specified

(+)-Catechin + Cu(II) + catalase: 330 µL 1000 µM (+)-catechin + 700 µL 472 µM Cu(II)SO<sub>4</sub> + catalase at concentration specified

<sup>\*</sup>Catalase was added immediately prior to addition of inoculum

Full details of the assay procedure is described in 'Antimicrobial activity of (+)-catechin and transition metal ion combinations' in the Materials & Methods section of main article
